# Supplementary material for: A Disease Resistance Elicitor Laminarin Enhances Tea Defense against a Piercing Herbivore Empoasca (Matsumurasca) onukii Matsuda
Source: PubMed Central journal article supplement (PMC6349920; doi:10.1038/s41598-018-37424-7), 2019-01-28

**A Disease Resistance Elicitor Laminarin Enhances Tea Defense  
against a Piercing Herbivore *Empoasca (Matsumurasca) onukii*  
Matsuda**

Zhaojun Xin, Xiaoming Cai, Shenglong Chen, Zongxiu Luo, Lei Bian,

Zhaoqun Li, Lingang Ge, Zongmao Chen

**Supplementary Table S1:** Description of the primers used for qRT-PCR.

| Gene           | Forward Primers (5'-3') | Reverse Primer (5'-3')  |
|----------------|-------------------------|-------------------------|
| <i>CsMAPK</i>  | AGGTGAGTTGATTGGTTGCG    | CCGCAATTGAAACCTGCTTG    |
| <i>CsWRKY3</i> | CACCACCCACCACTCACA      | AAAACCTTCATACCTCCT      |
| <i>CsPPO</i>   | GGTGGATCGAGACGTGTTG     | TCATCCTCAGCTCCCAACTC    |
| <i>CsFLS1</i>  | GCTCACACAGACATGTCCAC    | ACACAGCCCTGTACTTTCCA    |
| <i>CsCHIT1</i> | GAGGCCCAATCCAACCTTCC    | AAGGCTTCGGGTATTGTGGA    |
| <i>CsCalS</i>  | CCTGAGCTCTTCGACAGTGA    | AAGCATGAAAGCGGCAAAGA    |
| <i>GADPH</i>   | ATACCACGTCATCCTCGGT     | ACTTATGATGAAATCAAAGCTGC |

**Supplementary Fig. S1:** Effects of laminarin treatment on the transcript and protein levels of CsOPR3. (a) Mean transcript levels (+ SE, n = 5) of *CsOPR3* in leaves of tea plants treated with laminarin at a concentration of 200 mg L<sup>-1</sup> (Lam), relative to controls (Con). (b) Western blot analysis of the accumulation of CsOPR3. The grouping of blots was cropped from different parts of the same gel.

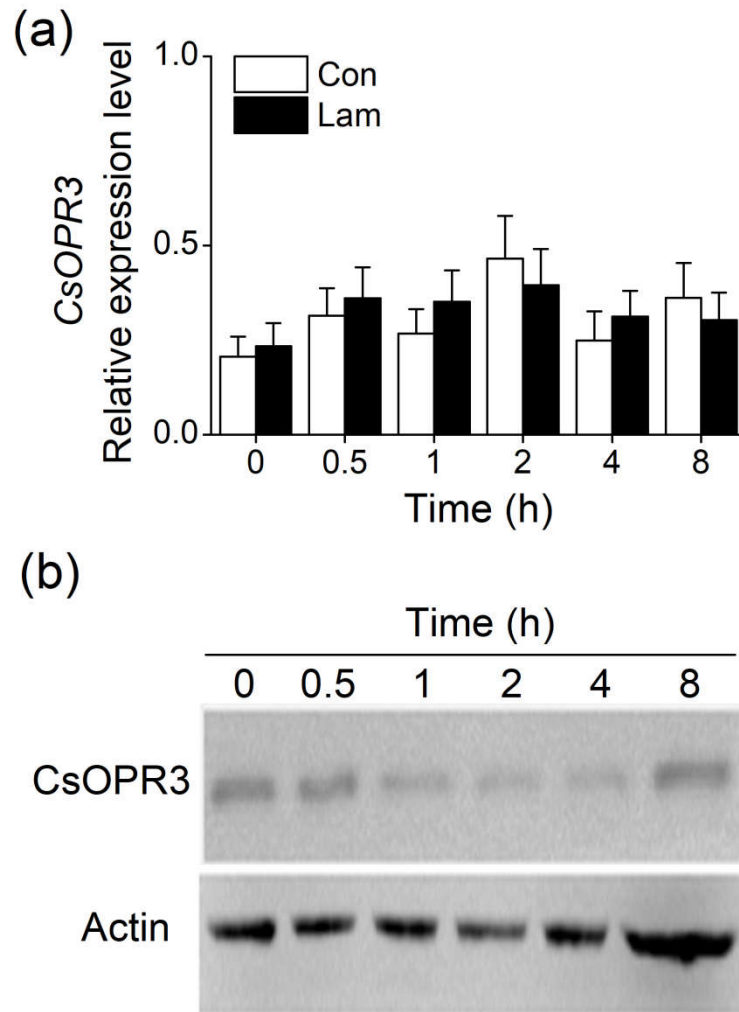

**Supplementary Fig. S2:** Relative changes in spider abundance (+SE, n = 3) in the field 5 and 10 days after tea plants were sprayed with laminarin at a concentration of 200 mg L<sup>-1</sup> (Lam).

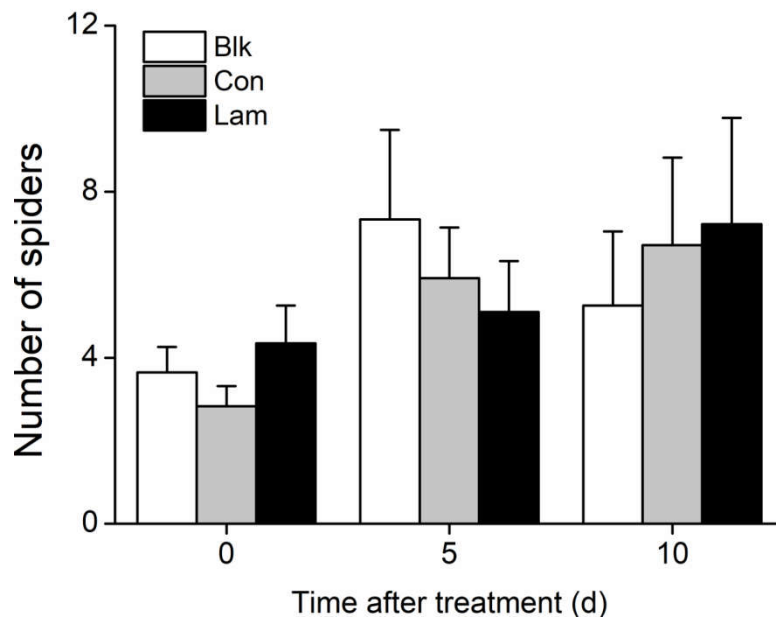

**Supplementary Fig. S3:** Design of the field experiment. Blk, plants were non-manipulated; Con, plant were sprayed with water with 0.01% Tween-20; Lam, plants were sprayed with 5 L of 200 mg L<sup>-1</sup> laminarin solutions containing 0.01% Tween-20

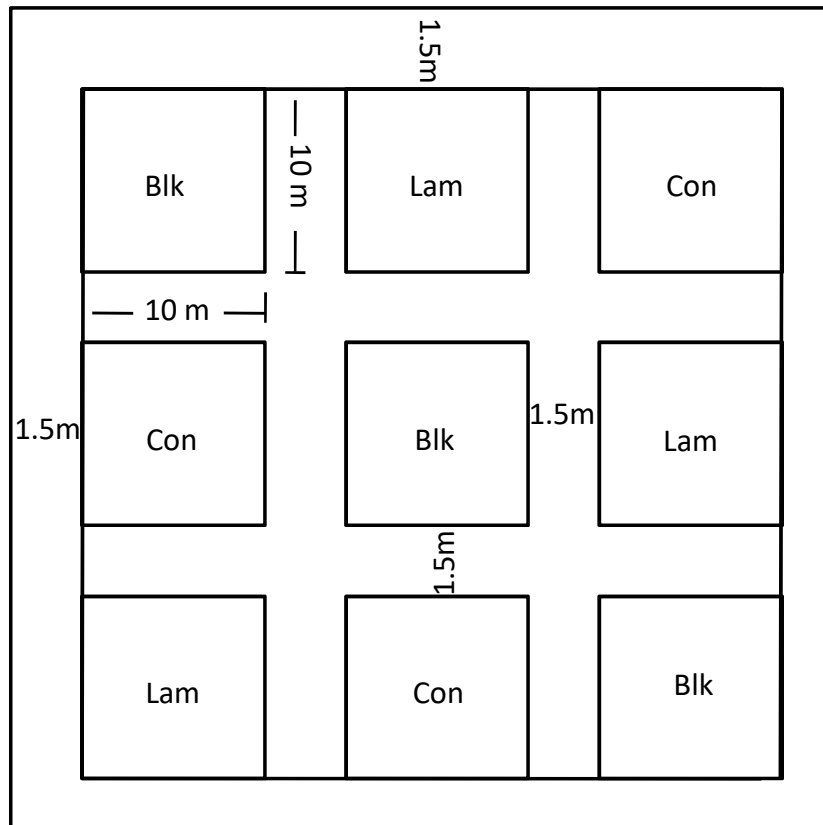

Supplement: 41598_2018_37424_MOESM1_ESM.pdf [file 41598_2018_37424_MOESM1_ESM.pdf]
